# Supplementary material
Source: PubMed Central journal article supplement (PMC5232352)
Supplement: mmc1.pdf [file mmc1.pdf]

**Biophysical Journal, Volume 112**

**Supplemental Information**

**Spermine Condenses DNA, but Not RNA Duplexes**

**Andrea M. Katz, Igor S. Tolokh, Suzette A. Pabit, Nathan Baker, Alexey V. Onufriev, and Lois Pollack**

## Supporting Material

### Spermine condenses DNA, but not RNA duplexes

Andrea M. Katz<sup>1</sup>, Igor S. Tolokh<sup>2</sup>, Suzette A. Pabit<sup>1</sup>, Nathan Baker<sup>3</sup>, Alexey V. Onufriev<sup>2,4</sup>, and Lois Pollack<sup>1</sup>

<sup>1</sup> School of Applied and Engineering Physics, Cornell University, Ithaca, NY 14853, USA

<sup>2</sup> Department of Computer Science, Virginia Tech, Blacksburg, VA 24061, USA

<sup>3</sup> Advanced Computing, Mathematics, and Data Division, Pacific Northwest National Laboratory, Richland, WA 99352, USA

<sup>4</sup> Department of Physics, Virginia Tech, Blacksburg, VA 24061, USA

*Contribution of spermine scattering to the WAXS signal.* To determine whether the observed differences in the WAXS signals stem from scattering of the spermine itself or conformational changes in the RNA, we used CRY SOL to examine simulated scattering from two sets of models. The first set contained the same snapshots from the MD simulations for the RNA/spermine system used in the main text. The second contained the exact same set of snapshots with the spermines deleted. Therefore, the RNA geometry is the same in these two sets, which differ only in the presence (or lack thereof) of spermine. The simulated scattering profiles from these two sets of models do not change significantly, as shown in Figure S1, suggesting that the observed experimental WAXS differences are a result of changes in RNA conformation. However, as discussed in the text (Results, wide angle x-ray scattering section), we acknowledge that caution must be exercised in using CRY SOL to interpret WAXS spectra, because it is not designed to accurately model local interactions in the solute or discrete interactions between solute and solvent.

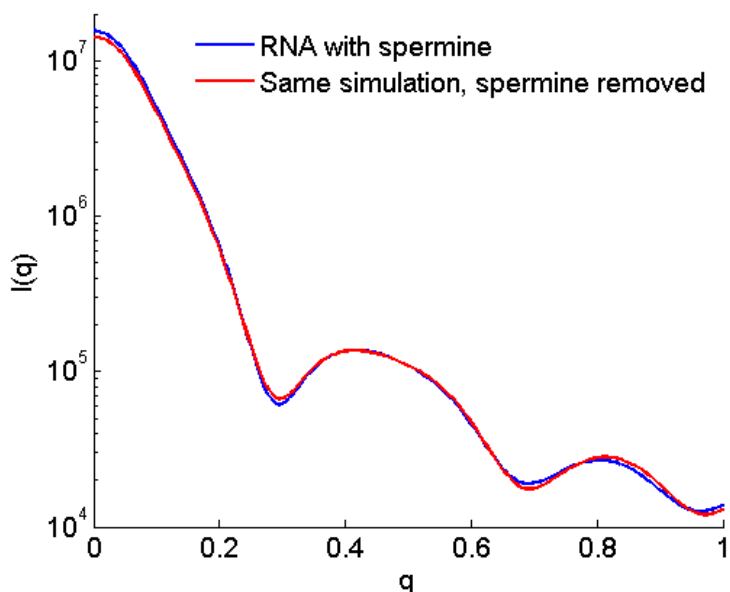

Figure S1. Scattering profiles computed with CRY SOL from (blue) snapshots from our simulations of the RNA/spermine system and (red) the exact same snapshots with the spermine removed from the PDB files before analysis with CRY SOL.

To further demonstrate the small effect of spermine on the scattering, we computed the difference profile from the curves above, shown in Figure S2, with the same scale as in Figure 6 of the main text. Figure 6 compares simulations of RNA with spermine and RNA without spermine (rather than this case, where we have deleted the spermine after the fact), and shows a larger signal. Clearly, the presence of the spermine does not cause the large changes seen in our WAXS patterns.

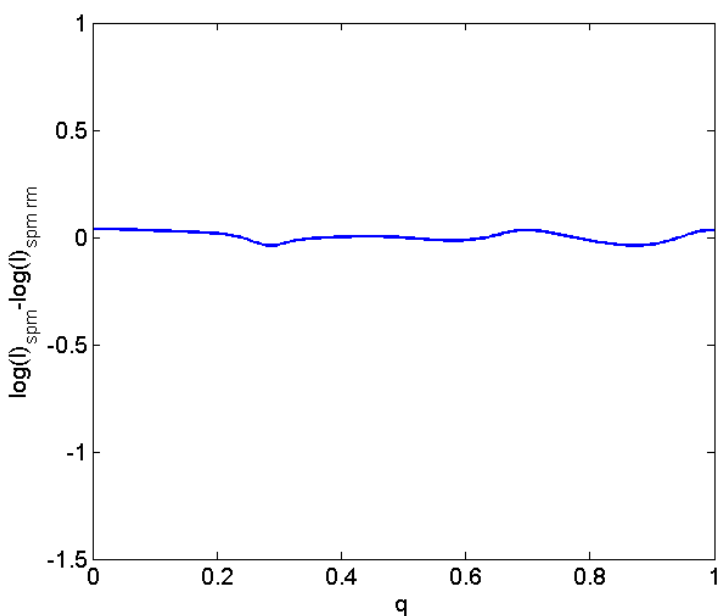

Figure S2. Difference profiles computed from the curves shown in Figure S1. The scale is the same as in Figure 6 of the main text.
